# Supplementary material
Source: PubMed Central journal article supplement (PMC4375434)
Supplement: mmc1.pdf [file mmc1.pdf]

## **Supporting Material**

### **Inter beat interval modulation in the sinoatrial node due to membrane current stochasticity – a theoretical and numerical study**

Hila Dvir and Sharon Zlochiver

Department of Biomedical Engineering, Faculty of Engineering, Tel-Aviv University,  
Tel-Aviv, Israel

### A. Derivation of equation 4 for a basic Hodgkin-Huxley model

We demonstrate the derivation of Eq. 4 for the following original Hodgkin-Huxley model for the squid's giant axon that incorporates capacitive, ion (sodium and potassium), leakage and stimulation currents [1]:

$$\frac{\partial v_m}{\partial t} = -(g_{Na}(v_m - E_{Na}) + g_K(v_m - E_K) + g_L(v_m - E_L) - I_p), \quad (A1)$$

where  $g_{Na}$  and  $g_K$  [ $\mu S/\mu F$ ] are the sodium and potassium channel conductivities (both nonlinear functions of  $v_m$  and  $t$  due to gating kinetics),  $g_L$  [ $\mu S/\mu F$ ] is the membrane leakage conductivity,  $E_x$  [mV] is the reversal potential of the  $x$  current, where  $x \in \{Na, K, L\}$ , and  $I_p$  [nA/nF] is a prescribed external current. By defining,

$$\begin{aligned} g(v_m, t) &\triangleq g_{Na} + g_K + g_L \\ \mu(v_m, t) &\triangleq \frac{g_{Na}E_{Na} + g_KE_K + g_LE_L + I_p}{g_{Na} + g_K + g_L} \end{aligned} \quad (A2)$$

Eq. A1 can be written as,

$$\frac{\partial v_m}{\partial t} = -g_m(v_m, t)[v_m - \mu(v_m, t)], \quad (A3)$$

which is similar to Eq. 4.

### B. Analytical expression for deterministic $g_m(v_m, t)$

An analytical expression for  $g_m(v_m, t)$  was derived from the kinetics model of Severi et al. [2], as follows,

$$g_m(v_m, t) = G1 + G2 + G3 + G4 + G5 + G6 + G7 + G8 + G9, \quad (B1)$$

where,

$$G1 = g_{Na} \cdot m^3 \cdot h \quad (B2)$$

$$G2 = \left( \frac{y^2 \cdot K_o}{K_o + Km_f} \right) \cdot g_{fNa} \quad (B3)$$

$$G3 = \left( \frac{y^2 \cdot K_o}{K_o + Km_f} \right) \cdot g_{fK} \quad (B4)$$

$$G4 = g_{Kr} \cdot (0.9 \cdot p_{aF} + 0.1 \cdot p_{aS}) \cdot p_i \quad (B5)$$

$$G5 = g_{KS} \cdot n^2 \quad (B6)$$

$$G6 = g_{to} \cdot q \cdot r \quad (B7)$$

$$G7 = \left[ \frac{2 \cdot P_{CaL}}{\frac{R \cdot T}{F} \cdot \left( 1 - \exp\left(\frac{-2 \cdot v_m}{\frac{R \cdot T}{F}}\right) \right)} \cdot \left( Ca_{sub} - Ca_o \cdot \exp\left(\frac{-2 \cdot v_m}{\frac{R \cdot T}{F}}\right) \right) \cdot d_L \cdot f_L \cdot f_{Ca} \right] +$$

$$\left[ \frac{0.000365 \cdot P_{CaL}}{\frac{R \cdot T}{F} \left( 1 - \exp\left(\frac{-v_m}{\frac{R \cdot T}{F}}\right) \right)} \cdot \left( K_i - K_o \cdot \exp\left(\frac{-v_m}{\frac{R \cdot T}{F}}\right) \right) \cdot d_L \cdot f_L \cdot f_{Ca} \right] + \left[ \frac{1.85 \cdot 10^{-5} \cdot P_{CaL}}{\frac{R \cdot T}{F} \left( 1 - \exp\left(\frac{-v_m}{\frac{R \cdot T}{F}}\right) \right)} \cdot \left( Na_i - Na_o \cdot \exp\left(\frac{-v_m}{\frac{R \cdot T}{F}}\right) \right) \cdot d_L \cdot f_L \cdot f_{Ca} \right] \quad (B8)$$

$$G8 = \frac{2 \cdot P_{CaT}}{\frac{R \cdot T}{F} \left( 1 - \exp\left(\frac{-2 \cdot v_m}{\frac{R \cdot T}{F}}\right) \right)} \cdot \left( Ca_{sub} - Ca_o \cdot \exp\left(\frac{-2 \cdot v_m}{\frac{R \cdot T}{F}}\right) \right) \cdot d_T \cdot f_T \quad (B9)$$

$$G9 = \begin{cases} g_{KACH} \cdot \left( 1 + \exp\left(\frac{v_m + 20}{20}\right) \right) \cdot a & ACh > 0 \\ 0 & o.w. \end{cases} \quad (B10)$$

For the definition of variables and coefficients in Eqs. B2-B10, refer to Severi et al. model [2].  $g_m(v_m)$  was calculated using Eq. B1 using the state variable values during a deterministic action potential, and is shown in Fig. S1 in the vicinity of  $v_{min}$  and for voltages corresponding to phase 4 depolarization (panels A and B, respectively).

In Eq. 22, the deterministic values of  $\mu$  and  $g_m$  during phase 4 depolarization, and the values of  $g_m$  and  $\left. \frac{\partial g_m}{\partial v_m} \right|_{v_{min} + \delta}$  in the vicinity of  $v_{min}$  are needed. Given the deterministic action potential  $v_m(t)$ ,  $\mu(v_m)$  during phase 4 depolarization was calculated according to Eq. 4 (setting  $\xi = 0$ ) using the  $g_m$  values from Fig. S1 panel B. The results given in Fig. S1 panel C demonstrate a monotonic, non-linear relationship between  $\mu$  and  $v_m$ , with  $\mu$  varying between -42 to -32 mV for voltages between -55 to -45 mV, that correspond to the major segment of phase 4 depolarization. Therefore, we took  $\mu = -37mV$  as an approximated constant value during that phase. As shown in panel B, during phase 4 depolarization  $g_m$  increases with  $v_m$  in an approximately linear curve, albeit with a relatively small slope of  $\frac{\partial g_m}{\partial v_m} \sim 0.34 s^{-1}/mV$ . We therefore approximated  $g_m$  as constant during that phase with a value of  $g_m \approx 10\mu S/\mu F$ . At  $v_{min}$ ,  $g_m(v_m)$  is non-differentiable, as seen in panel D. We therefore considered in Eq. 13 and forward the values of  $g_m(v_m)$  and

$\frac{\partial g_m}{\partial v_m}$  in the vicinity of  $v_{min}$ , i.e.,  $v_{min} + \delta$ . Panels A and D suggest that  $g_m(v_{min} + \delta, t) \approx 6.6 \mu S / \mu F$  and  $\left. \frac{\partial g_m(v_m)}{\partial v_m} \right|_{v_{min} + \delta} \approx -10 s^{-1} / mV$ .

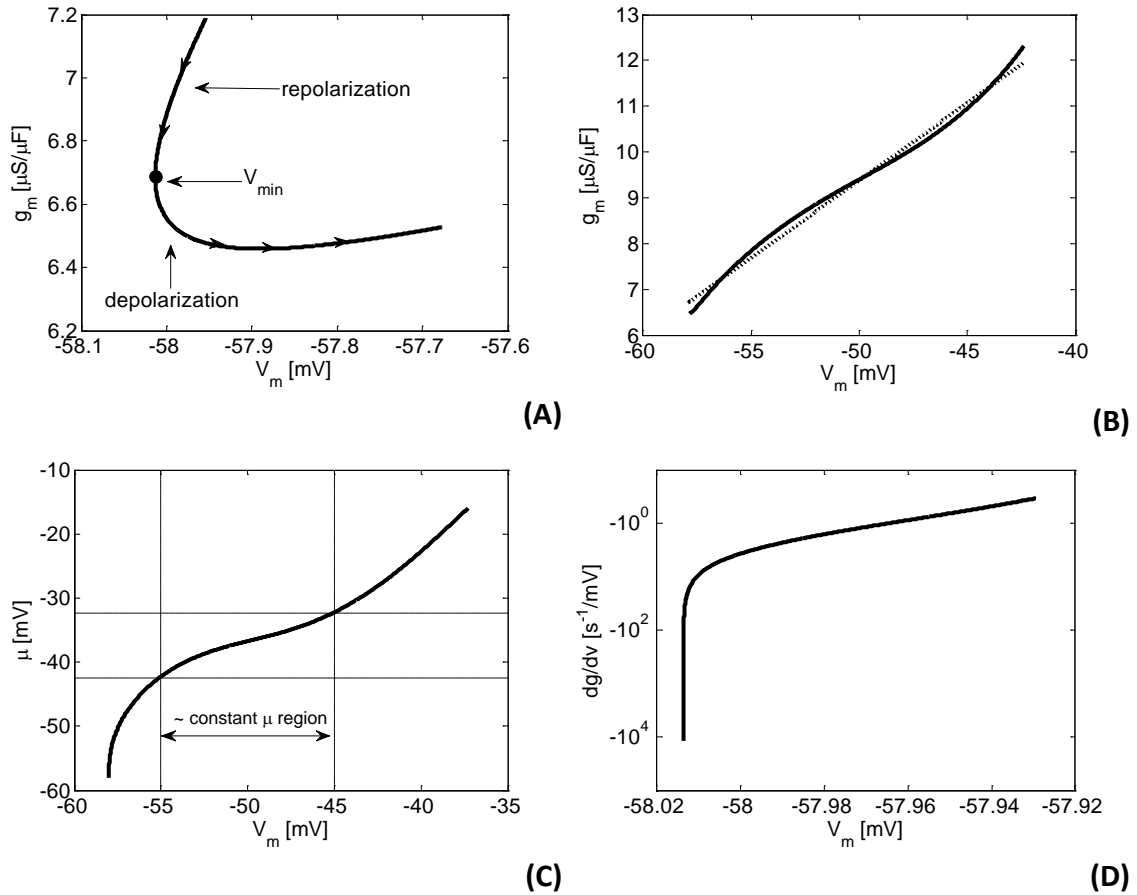

**Figure S1.** Mathematical analysis of the deterministic general conductivity,  $g_m(v_m)$  and the general voltage term,  $\mu(v_m)$ . (A)  $g_m(v_m)$  for "end-diastolic" voltage region. (B-C)  $g_m(v_m)$  (panel B) and  $\mu(v_m)$  (panel C) for phase 4 depolarization voltage region. (D)  $\frac{\partial g_m(v_m)}{\partial v_m}$  for "end-diastolic" voltage region.

## SUPPORTING REFERENCES

1. Hille, B., 2001. Ion channels of excitable membranes. Sunderland, MA: Sinauer.
2. Severi, S., M. Fantini, L. A. Charawi, & D. DiFrancesco, 2012. An updated computational model of rabbit sinoatrial action potential to investigate the mechanisms of heart rate modulation. The Journal of Physiology, 590:4483-4499.
